# Supplementary material for: Cell-derived anaphylatoxins as key mediators of antibody-dependent type II autoimmunity in mice
Source: JCI journal article supplement (doi:10.1172/jci25536), 2006-01-19
Supplement: sd1 [file 1]

34-3C mAb (300  $\mu$ g)

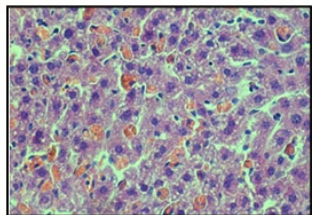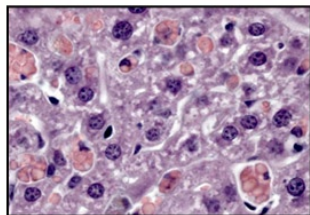

WT

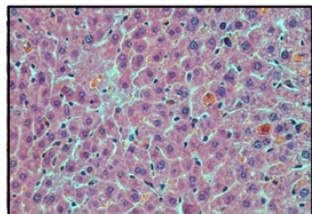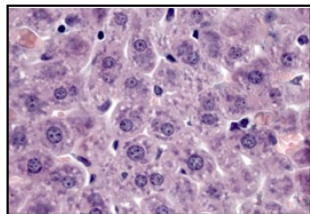

C5aR<sup>-/-</sup>

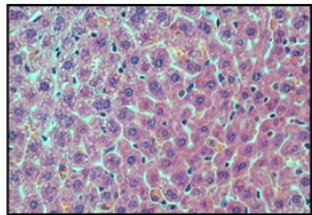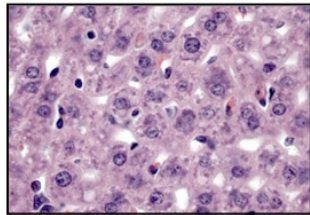

Fc $\gamma$ RI/RII<sup>-/-</sup>

40X

100X

## **SUPPLEMENTARY FIGURE LEGENDS**

Suppl.-Figure 1: Histopathology from anemic WT, C5aR<sup>-/-</sup> and FcγRI/III<sup>-/-</sup> mice.

Representative histological appearance of liver from the indicated mice on day 2 after induction of anemia by the injection of 300μg of the pathogenic IgG2a 34-3C anti-RBC mAb (hematoxylin and eosin stained; original magnifications: 40x, 100x).
